# Supplementary material for: The Evolution of Cognitive Abilities in Marine Animals: Insights from Cognition Gene Polymorphism in Coelacanths and Lungfish
Source: Research Square preprint supplement (doi:10.21203/rs.3.rs-6373286/v1), 2025-04-25
Supplement: Supplementary file 2 [file b2176a8aa216fd7af92d1e07.xlsx]

## Sheet: Top_SNVs_Features
SNV_ID	Gene	Ensembl ID	mmc3	mmc4	rsID	GRCh38	Degree	MI_Mean	Module	Betweenness	Closeness	Global_Modularity
snp277	ASPM	ENSG00000066279			rs1451306414	1:197102257	33	0.271193780116458	2	50.1695555421651	0.00304878048780488	0.367453487350213
snp278	ASPM	ENSG00000066279			rs774143329	1:197093060	44	0.28441190391645	2	151.147988512138	0.00320512820512821	0.367453487350213
snp284	ASPM	ENSG00000066279			rs199422181	1:197100583	44	0.27925242622875	2	140.648223796208	0.003125	0.367453487350213
snp307	DAB1	ENSG00000173406		17	rs532864586	1:57023633	34	0.273245500395403	2	101.253665281743	0.00304878048780488	0.367453487350213
snp301	DAB1	ENSG00000173406			rs75129043	1:58534181	41	0.277042420025732	2	129.736733515193	0.003125	0.367453487350213
snp303	DAB1	ENSG00000173406			rs199645763	1:57290956	45	0.278086449345885	2	242.635930867404	0.0032258064516129	0.367453487350213
snp324	FADS2	ENSG00000134824			rs149777687	11:61848203	48	0.286130113713883	15	482.577976334238	0.00323624595469256	0.367453487350213
snp328	FADS2	ENSG00000134824			rs2135964926	11:61845024	34	0.296552674940623	1	483.340610655426	0.0032258064516129	0.367453487350213
snp332	GNB5	ENSG00000069966			rs190432484	15:52147482	63	0.300769641172476	15	1851.70423627116	0.00373134328358209	0.367453487350213
snp349	GRID2	ENSG00000152208		37	rs75225211	4:93216803	39	0.27789200819483	15	249.390896532812	0.00313479623824451	0.367453487350213
snp351	GRID2	ENSG00000152208			rs182933054	4:93490761	36	0.277731968397107	15	93.7987383593078	0.003125	0.367453487350213
snp376	IGF2R	ENSG00000197081			rs121434588	6:160070006	46	0.287866943712597	15	476.145194747233	0.0032258064516129	0.367453487350213
snp373	IGF2R	ENSG00000197081			rs199651009	6:160096545	42	0.282729360808603	15	181.663647567986	0.00318471337579618	0.367453487350213
snp408	MCPH1	ENSG00000147316			rs370275760	8:6480848	35	0.283511905510438	15	340.336548533669	0.00317460317460317	0.367453487350213
snp411	NBPF8	ENSG00000270231			rs320820	1:120449281	38	0.283978956476188	2	93.3003156874158	0.0031055900621118	0.367453487350213
snp413	NBPF8	ENSG00000270231			rs1293062874	1:120430560	75	0.320025395366198	1	1900.19196849704	0.00395256916996047	0.367453487350213
snp414	NBPF8	ENSG00000270231			rs1378831317	1:120468376	83	0.31472219199108	4	2153.71811865977	0.00404858299595142	0.367453487350213
snp417	NBPF8	ENSG00000270231			rs1660852853	1:120430716	47	0.299218683658336	1	468.612035648848	0.00341296928327645	0.367453487350213
snp246	NRXN1	ENSG00000179915		52	rs750156118	2:50506601	53	0.290743756872526	2	368.778226401252	0.00336700336700337	0.367453487350213
snp253	THSD7B	ENSG00000144229			rs35967139	2:137076879	58	0.307853746728492	1	758.326735932274	0.0036101083032491	0.367453487350213
