# Supplementary material for: The Evolution of Cognitive Abilities in Marine Animals: Insights from Cognition Gene Polymorphism in Coelacanths and Lungfish
Source: Research Square preprint supplement (doi:10.21203/rs.3.rs-6373286/v1), 2025-04-25
Supplement: Supplementary file 3 [file cdb074dfc0819a26285fbc97.xlsx]

## Sheet: Sheet1
		Table 4s Top20 CG SNVs in 472 samples
	NRXN1-7	THSD7B-2	ASPM-02	ASPM-03	ASPM-09	DAB1-5	DAB1-7	DAB1-11	FADS2-4	FADS2-8	GNB5-1	GRID2-5	GRID2-7	IGF2R-7	IGF2R-10	MCPH1-011	NBPF8-1	NBPF8-3	NBPF8-4	NBPF8-7
	snp246	snp253	snp277	snp278	snp284	snp301	snp303	snp307	snp324	snp328	snp332	snp349	snp351	snp373	snp376	snp408	snp411	snp413	snp414	snp417
sample
et1	A	ATGC	AG	G	AG	T	A	C	0	ATGC	0	G	A	0	0	0	A	AC	AG	AG
ga1	A	TGC	G	0	G	T	A	C	C	ATGC	T	0	A	C	G	G	A	ATGC	AG	ATGC
ga2	A	ATG	G	G	G	T	A	C	C	ATGC	T	G	A	C	G	G	A	TGC	AG	ATGC
ga3	A	ATGC	G	G	G	T	A	C	C	ATGC	T	G	A	C	G	G	A	ATC	AG	ATG
ga4	A	TGC	G	G	G	T	A	C	C	ATGC	T	G	A	C	G	G	A	ATGC	AG	ATGC
ga5	A	ATGC	G	G	G	T	A	C	C	ATGC	T	G	A	C	G	G	A	TGC	AG	ATGC
ga6	A	ATGC	G	G	G	T	A	C	C	ATGC	T	G	A	C	G	G	A	ATGC	AG	AGC
ke1	A	ATGC	G	G	G	T	A	C	C	ATGC	T	G	A	C	G	G	AG	ATC	AG	ATG
mo1l	0	ATG	0	0	0	0	0	0	0	ATG	0	0	0	0	0	A	A	ATGC	0	ATG
mo1s	0	AG	0	0	0	0	0	0	0	0	0	0	0	0	0	0	A	TC	0	AG
sa1	A	AGC	G	G	G	T	A	C	C	ATGC	T	G	A	C	G	G	A	ATC	AG	ATGC
sa2	A	ATGC	G	TG	G	AT	AG	C	C	ATGC	T	TG	A	GC	G	G	A	ATGC	AG	ATGC
sa3	0	TG	G	TG	TG	AT	A	C	C	A	T	G	AT	C	G	0	AT	TC	0	AGC
ss2	A	ATG	G	0	G	0	A	C	C	AT	T	G	0	0	G	AG	A	AC	G	AG
ss3	0	ATG	0	0	G	0	A	C	C	AGC	0	0	A	0	G	AG	A	C	AG	ATG
mt1	A	AG	G	G	G	T	A	C	C	A	T	G	A	C	AG	G	A	C	AG	ATGC
sm5	A	G	G	G	G	0	A	C	C	0	0	G	A	C	G	G	A	AC	AG	AG
sd1	0	0	0	0	0	0	0	0	0	0	0	0	0	0	0	0	0	0	0	G
af1	A	AGC	G	G	G	T	A	C	C	A	T	G	A	C	G	G	A	AC	G	G
af2	A	AG	G	G	G	T	A	C	C	A	T	G	A	0	G	G	AG	AC	TG	G
sw1	0	AG	0	G	0	0	0	0	C	0	0	0	0	C	0	G	A	AC	G	AG
vs1	0	AG	G	G	G	0	A	C	C	A	T	0	A	0	G	G	A	AC	ATG	G
cy1	A	G	AG	G	G	T	A	C	C	A	T	G	A	T	G	G	A	C	AG	AG
cy2	A	AG	G	G	G	T	A	C	C	A	T	G	A	0	G	G	A	C	AG	AG
cy3	AG	G	G	G	G	T	A	C	0	A	T	G	0	C	G	G	A	C	AG	AG
cy4	A	G	G	G	G	T	A	C	C	A	T	G	A	TC	G	G	A	C	AG	AGC
cy5	A	AG	G	G	G	T	A	C	C	A	T	G	A	C	G	G	A	C	AG	AG
cy6	A	AG	G	G	G	T	A	C	C	0	T	G	A	C	G	G	A	C	AG	AG
gu1	A	AG	G	0	0	T	0	C	C	0	T	G	A	C	G	G	A	AC	AG	GC
gu2	A	AG	G	G	G	T	A	C	C	A	TG	G	A	C	G	G	A	AC	AG	GC
gu3	A	G	G	G	G	T	A	C	C	A	TG	G	A	TC	G	G	A	AC	AG	AG
yo1	A	AG	G	G	G	T	A	C	C	A	T	G	A	C	G	G	A	ATC	AG	ATGC
yo3	A	G	G	G	G	T	A	C	C	A	T	G	A	C	G	G	A	AC	AG	ATGC
yo4	A	ATG	G	G	G	T	A	C	C	A	T	G	A	C	G	G	A	AC	AG	AG
nt1	A	G	G	G	G	T	A	C	C	A	T	G	A	C	G	G	A	AC	G	G
nt2	A	G	G	G	G	T	A	C	C	A	T	G	A	TC	G	G	A	AC	G	G
nt3	A	G	G	G	G	T	A	C	C	A	T	G	A	C	G	G	A	AGC	AG	AG
nt4	A	AG	G	G	G	T	A	C	C	A	T	G	A	C	G	G	A	C	G	G
nt5	A	AG	G	G	G	T	A	C	C	A	T	G	A	C	G	G	A	AGC	G	G
mo2	0	G	0	G	0	0	0	0	0	0	0	0	0	0	0	0	0	AC	0	AG
mo3	A	AGC	G	G	G	T	A	C	C	A	T	G	A	C	G	G	AG	AC	AG	AG
mo4	A	G	G	G	G	T	A	C	C	A	T	G	A	C	G	G	A	AC	AG	G
lb1	0	AG	0	0	0	T	0	0	C	0	0	0	0	C	G	G	AG	C	AG	AGC
mb1	0	TG	0	0	0	0	0	0	0	0	0	0	0	0	0	0	0	0	0	0
c4	A	ATG	G	G	G	T	A	C	0	ATGC	0	0	0	0	0	0	A	C	AG	AG
c5	A	ATG	G	G	G	T	A	C	0	ATGC	0	0	0	0	0	0	A	C	G	ATGC
c6	A	ATGC	0	0	0	T	A	C	C	ATGC	T	G	0	0	G	G	A	ATGC	AG	ATGC
c7	0	ATGC	G	G	0	0	0	0	0	A	0	0	0	0	0	G	A	ATGC	G	ATGC
c8	0	ATGC	G	0	0	T	A	0	0	ATC	T	0	0	0	0	0	A	ATGC	G	ATGC
c9	A	ATGC	G	G	G	T	AT	C	C	ATGC	T	G	A	AC	G	AG	ATG	ATC	ATG	ATGC
c11	A	ATGC	G	G	G	TG	AG	C	C	ATGC	T	G	A	C	G	G	A	TGC	AGC	ATGC
c12	A	ATG	G	G	G	TC	A	C	C	ATGC	T	G	A	C	TG	AG	A	ATGC	AG	ATGC
c13	A	ATGC	G	G	G	T	A	C	C	ATGC	TG	G	A	C	G	G	A	ATGC	AG	ATGC
c14	A	ATGC	G	G	G	T	A	C	C	ATGC	T	G	A	C	G	G	A	ATGC	AG	ATGC
c15	A	ATGC	AG	G	G	T	0	0	C	ATGC	T	0	A	T	0	AG	A	ATGC	ATG	ATGC
c16	A	ATGC	G	0	G	T	0	C	C	ATGC	0	G	A	C	G	G	A	ATC	AG	ATGC
c17	A	ATGC	AG	G	G	T	A	C	C	ATGC	T	G	A	C	G	G	A	TC	AG	ATG
c18	A	ATGC	G	0	G	T	A	C	C	ATGC	T	G	A	C	G	G	A	ATC	G	ATGC
c19	A	ATGC	G	0	0	T	A	0	C	ATGC	T	G	0	0	G	0	A	ATGC	G	ATGC
c20	0	0	0	0	0	0	0	0	0	0	0	0	0	0	0	0	0	C	0	G
c21	A	ATGC	G	G	G	T	0	C	T	ATGC	T	G	A	0	G	G	A	ATGC	AG	ATGC
c22	A	ATGC	G	G	G	T	A	C	C	ATGC	T	G	A	AC	G	G	A	ATGC	G	ATG
c23	A	ATGC	AG	G	G	T	A	C	C	ATGC	T	G	A	TC	G	G	A	ATC	AG	ATGC
c24	A	ATGC	G	G	G	T	A	C	C	G	T	G	A	C	G	G	A	ATC	G	ATGC
c25	0	ATGC	0	0	0	0	0	0	0	ATGC	0	0	0	0	0	G	AC	ATGC	G	ATGC
c26	0	ATGC	0	0	G	0	0	0	0	TGC	0	0	A	0	G	0	A	ATGC	G	ATGC
c27	A	ATGC	G	G	G	T	A	C	C	ATGC	T	G	A	C	AG	G	A	ATGC	TG	ATG
dc1	A	ATGC	G	TG	G	T	A	C	C	ATGC	TC	G	A	C	G	G	A	ATGC	ATGC	ATGC
dc2	A	TGC	G	TG	G	T	AT	C	GC	ATGC	T	G	A	C	G	G	A	ATC	G	ATGC
dc3	A	AGC	G	TG	G	T	A	TC	C	ATGC	T	TGC	A	GC	AG	G	AC	TGC	AG	ATGC
dg1	0	G	0	0	0	0	0	0	0	0	0	0	0	0	0	0	0	C	0	ATG
dg2	0	0	0	0	0	0	0	0	0	0	0	0	0	0	0	0	0	0	0	G
in4	A	ATG	G	G	G	T	A	AC	C	A	T	G	A	C	G	G	A	AC	G	TG
in5	A	AG	G	G	G	T	A	C	C	A	T	G	A	C	G	G	A	AC	G	G
in7	A	AG	G	G	G	T	A	C	C	A	T	G	A	C	G	G	A	AC	G	TG
in8	A	AG	G	G	G	T	A	C	C	AC	T	G	A	C	G	G	A	AC	G	G
in9	A	ATG	G	G	G	T	A	C	C	A	T	G	A	AC	G	G	A	AC	G	TG
mg1	0	ATGC	0	0	0	0	0	0	0	ATG	0	G	0	0	0	G	0	ATGC	0	ATGC
ne10m	0	TG	0	0	0	0	0	0	0	ATGC	0	0	A	0	0	G	AG	ATC	0	ATGC
ne2	0	TG	0	G	G	0	0	C	C	ATGC	0	0	0	C	G	G	A	AC	G	TGC
ne3	A	TG	G	G	G	0	A	C	C	ATGC	0	G	A	0	G	G	A	TC	G	AG
ne5	A	ATG	G	G	G	T	A	C	C	ATGC	T	G	A	C	G	G	A	ATC	ATG	ATGC
ne9m	0	ATGC	0	0	0	0	0	0	0	ATG	0	0	0	0	0	0	A	ATGC	AG	ATGC
ja1	A	ATG	G	G	G	T	A	C	C	0	T	G	A	C	G	AG	A	AC	AG	AG
ja2	A	ATG	AG	G	G	T	A	C	C	ATGC	T	G	0	C	0	A	A	C	AG	AG
jm1	0	G	0	0	0	0	0	0	0	0	0	0	0	0	0	0	0	0	0	AG
jm2	0	0	0	0	0	0	A	C	0	0	0	G	0	0	0	0	A	0	0	AG
pa4	A	TG	G	G	G	AT	A	C	0	ATG	0	G	A	0	0	0	A	C	G	AG
pa5	A	AG	G	G	G	T	A	C	0	0	0	0	0	0	0	0	A	A	G	G
pa6	A	AG	G	G	G	T	A	C	C	A	T	G	A	C	G	G	AG	AC	G	G
sr1	A	G	G	G	G	T	A	C	C	A	AT	G	A	C	G	G	AG	AGC	AG	ATG
sr2	A	ATG	G	G	G	T	A	C	C	ATGC	T	G	A	C	G	G	AC	AGC	AG	AG
sr3	A	AG	G	G	G	T	A	C	C	A	T	G	A	C	G	G	A	AC	G	G
kz1	A	AG	G	G	G	T	A	C	C	A	T	G	A	C	G	G	AG	AC	G	G
kz2	A	AG	G	G	G	T	A	C	0	0	0	G	A	TC	G	AG	A	AC	G	TG
kz3	A	AG	G	AG	G	T	A	C	C	A	0	G	A	C	G	G	AG	AC	G	G
cz1	A	ATGC	0	G	G	T	A	C	C	ATGC	T	G	AC	C	G	G	A	ATGC	AG	ATGC
de2	0	TG	0	0	0	T	A	0	0	ATG	T	0	0	0	G	0	A	ATC	G	AGC
de3	A	AGC	G	G	G	T	A	C	C	ATGC	T	G	A	C	G	G	A	ATC	ATG	ATGC
de4	0	TG	0	0	0	T	0	0	0	TG	0	0	0	0	0	0	A	AC	G	AG
de5	A	ATGC	G	G	G	T	A	C	C	ATGC	T	G	A	C	G	G	A	TC	TG	ATGC
dep	A	GC	G	G	G	T	A	C	C	ATGC	T	G	A	C	G	G	A	ATC	ATG	GC
fi1	A	AG	G	G	G	T	A	C	C	ATGC	T	G	A	C	G	G	AG	ATGC	AG	ATGC
fi2	A	ATG	G	G	G	T	A	C	C	ATGC	T	G	A	C	G	G	A	ATGC	ATG	AGC
fi3	A	ATG	G	G	G	T	A	C	C	ATGC	T	G	A	C	G	G	A	ATC	AG	AG
ge1	0	TG	0	A	0	T	0	0	0	ATGC	0	G	A	C	0	G	A	AC	G	ATGC
ge1n	A	G	G	G	G	T	A	C	C	A	T	G	A	TC	G	G	A	AC	AG	G
z1	A	AG	G	G	G	T	AG	C	C	A	T	G	A	C	G	G	AG	C	AG	G
z2	A	ATG	G	G	G	T	A	C	C	A	T	G	A	C	G	G	AG	C	AG	G
z3	A	ATG	G	G	G	T	A	C	TC	A	T	G	A	AC	G	AG	A	C	AG	G
z4	0	G	0	G	G	0	A	C	C	0	T	G	A	C	0	G	A	AC	AG	TGC
z5	A	AG	AG	G	G	T	A	C	C	A	T	G	A	C	G	G	A	AC	ATG	ATG
z6	A	AG	G	G	G	T	A	C	C	A	T	G	A	C	G	G	A	AC	AG	ATG
la1	A	TG	G	AG	G	T	A	C	0	ATG	0	0	0	0	G	0	AG	C	G	AG
nd1	0	G	0	0	0	0	A	0	0	0	0	0	0	0	0	0	A	AC	AG	ATGC
nd1n	0	0	0	0	0	0	0	0	0	0	0	0	0	0	0	0	0	0	0	G
nd10	0	G	0	G	0	0	0	0	0	G	0	0	0	0	0	0	0	C	0	GC
nd11	0	G	0	0	0	T	0	0	0	0	0	0	0	0	0	0	0	0	0	ATGC
nd2	0	ATG	0	0	0	0	0	0	0	ATGC	0	0	0	0	0	0	0	TC	0	ATG
nd3	0	G	0	0	0	0	0	0	0	T	0	0	0	0	0	0	0	C	0	AG
nd4n	A	ATG	G	AG	G	T	A	C	C	ATGC	T	G	A	C	G	G	A	ATC	TG	ATG
nd5n	0	ATG	G	0	0	0	A	0	C	T	T	G	0	0	G	0	A	ATC	ATG	AG
nd6	A	AG	0	0	0	0	0	0	0	ATC	0	0	0	0	0	0	0	TGC	0	AG
nd7	0	ATG	0	0	0	0	0	0	0	GC	0	0	0	0	0	0	0	TGC	T	ATG
nd8	0	ATGC	0	0	0	T	A	0	0	ATGC	T	G	A	0	G	0	A	TC	ATG	AG
nd9	0	AGC	0	0	0	0	0	0	0	ATC	T	0	0	T	0	0	A	ATGC	0	AGC
sp1	A	AG	G	G	G	T	A	C	C	A	T	G	A	C	G	G	A	AC	AG	AG
sp2	A	ATG	G	G	G	T	A	C	C	ATGC	T	G	A	C	G	G	A	ATGC	AG	ATGC
sp3	A	AG	G	G	G	T	A	C	C	ATGC	T	G	A	C	G	G	A	TC	G	ATGC
sp4n	A	ATGC	G	G	G	T	A	C	C	ATGC	T	G	A	C	G	G	A	ATGC	ATG	ATGC
sp5	A	G	G	G	G	T	AG	C	C	A	T	G	A	C	G	G	AG	ATC	AG	AG
sp6	0	AG	0	0	G	0	0	0	0	0	0	0	0	0	0	0	0	C	0	AG
m10	0	0	0	0	0	0	0	0	0	0	0	0	0	0	0	0	0	0	0	0
m12	0	0	0	0	0	0	0	0	0	0	0	0	0	0	0	0	0	0	0	0
m13	0	0	0	0	0	0	0	0	0	0	0	0	0	0	0	0	0	0	0	0
m14	0	0	0	0	0	0	0	0	0	0	0	0	0	0	0	0	0	0	0	0
m15	0	0	0	0	0	0	0	0	0	0	0	0	0	0	0	0	0	0	0	0
m16	0	0	0	0	0	0	0	0	0	0	0	0	0	0	0	0	0	0	0	0
m17	0	0	0	0	0	0	0	0	0	0	0	0	0	0	0	0	0	0	0	0
m1	0	0	0	0	0	0	0	0	0	0	0	0	0	0	0	0	0	0	0	0
m2	0	0	0	0	0	0	0	0	0	0	0	0	0	0	0	0	0	0	0	0
m3	0	0	0	0	0	0	0	0	0	0	0	0	0	0	0	0	0	0	0	0
m4	0	0	0	0	0	0	0	0	0	0	0	0	0	0	0	0	0	0	0	0
m5	0	0	0	0	0	0	0	0	0	0	0	0	0	0	0	0	0	0	0	0
m6	0	0	0	0	0	0	0	0	0	0	0	0	0	0	0	0	0	0	0	0
m7	0	0	0	0	0	0	0	0	0	0	0	0	0	0	0	0	0	0	0	0
m8	0	0	0	0	0	0	0	0	0	0	0	0	0	0	0	0	0	0	0	0
m9	0	0	0	0	0	0	0	0	0	0	0	0	0	0	0	0	0	0	0	0
km1	0	ATGC	0	0	0	0	0	0	0	ATGC	0	0	0	0	0	0	0	TGC	0	ATGC
sc1	G	ATGC	0	0	0	T	A	C	0	ATG	0	0	0	0	0	0	A	C	TG	ATG
us1	AG	ATGC	G	G	G	T	A	C	C	ATGC	T	G	A	C	G	G	A	C	AG	AG
us2	0	ATGC	0	G	0	0	A	C	C	ATGC	0	G	0	C	G	G	A	ATC	G	ATGC
so3	A	AG	G	G	G	T	A	C	C	A	T	G	A	C	G	G	A	C	AG	G
so4	AG	AG	G	G	G	T	A	C	0	0	0	0	0	0	0	0	A	C	G	G
so4n	AG	AG	G	G	G	T	A	C	C	A	T	AG	A	C	G	G	A	C	AG	G
so5	A	AG	AG	AG	G	T	A	C	0	0	0	G	A	C	G	G	A	C	ATG	G
p1	A	G	0	G	G	0	A	C	C	ATGC	C	G	A	C	G	0	0	TGC	0	ATGC
p10	A	ATG	G	AG	G	T	A	C	C	ATGC	C	G	A	C	G	G	A	TGC	G	ATGC
p11	A	TG	G	G	G	T	A	C	C	ATGC	C	G	A	T	G	G	A	ATGC	G	ATGC
p12	A	ATGC	G	G	G	T	A	C	T	ATGC	T	G	A	0	G	G	A	ATC	TG	ATGC
p13	A	TGC	G	AG	G	T	A	C	C	ATGC	C	G	A	T	G	G	A	ATGC	G	AGC
p14	A	ATG	0	G	G	T	A	C	C	ATGC	C	G	A	C	G	0	A	ATC	G	ATGC
p15	A	G	0	0	G	0	T	C	C	ATGC	C	G	A	C	G	0	0	ATGC	0	ATGC
p16	G	0	0	0	0	0	0	C	0	ATGC	0	G	0	0	0	G	0	0	0	ATGC
p17	G	0	0	0	G	0	A	C	0	ATGC	0	0	0	0	0	0	0	0	0	ATGC
p18	A	TG	G	AG	G	T	A	C	C	ATGC	C	G	A	C	G	G	A	ATC	G	ATGC
p19	0	ATG	G	AG	G	0	A	C	C	ATGC	T	G	A	C	G	G	A	ATGC	G	ATG
p2	A	0	0	G	G	0	A	C	C	ATGC	C	G	A	C	G	0	0	ATC	G	ATGC
p20	A	TG	G	AG	G	T	A	C	C	ATGC	C	G	A	C	G	G	A	TGC	TG	AGC
p21	A	ATGC	G	G	G	T	A	C	T	ATGC	T	G	A	C	G	G	A	ATGC	ATG	ATGC
p22	G	G	0	0	G	0	A	C	0	ATGC	T	G	0	0	0	0	0	0	0	ATGC
p23	A	TG	G	AG	G	T	A	C	C	ATGC	C	G	A	C	G	G	A	ATC	G	ATGC
p24	A	G	0	G	G	0	A	C	C	ATGC	C	G	A	C	G	0	0	TGC	0	ATGC
p25	G	0	0	0	G	C	0	C	0	ATGC	0	G	0	0	0	0	0	0	0	ATGC
p26	A	ATG	G	AG	G	T	A	C	C	ATGC	C	G	A	C	G	G	A	TGC	G	ATGC
p27	A	0	0	G	G	0	A	C	C	ATGC	C	G	A	T	0	0	0	ATC	G	ATGC
p28	A	TG	G	G	G	T	A	C	C	ATGC	C	G	A	C	G	G	A	ATGC	G	ATGC
p29	A	ATG	G	AG	G	T	A	C	C	ATGC	T	G	A	C	G	G	A	ATC	TG	ATGC
p3	A	ATG	G	AG	G	T	A	C	C	ATGC	T	G	A	C	G	G	A	ATC	TG	ATGC
p30	G	0	0	0	0	0	A	C	0	ATGC	C	0	0	0	0	0	0	0	0	ATGC
p31	A	TG	G	G	G	T	A	C	C	ATGC	C	G	A	T	G	G	A	ATGC	G	ATGC
p32	A	ATG	G	AG	G	T	A	C	C	ATGC	C	G	0	C	G	G	A	ATC	G	ATGC
p33	A	0	0	G	G	0	A	C	C	ATGC	C	G	A	C	G	0	0	ATC	G	ATGC
p4	A	ATG	G	AG	G	T	A	C	C	ATGC	C	G	0	C	G	G	A	ATC	G	ATGC
p5	A	G	G	G	G	T	A	C	T	ATGC	T	G	A	C	G	G	A	ATC	G	ATGC
pp6	A	ATG	G	G	G	T	A	C	C	ATGC	T	G	A	C	G	G	A	TC	AG	ATGC
p7	A	TG	G	G	G	T	A	C	C	ATGC	C	G	A	C	G	G	A	ATGC	G	ATGC
p8	A	TG	G	G	G	T	A	C	C	ATGC	T	G	A	C	G	G	A	TC	AG	ATGC
p9	A	ATG	G	G	G	T	A	C	C	ATGC	T	G	A	C	G	G	A	ATC	AG	ATGC
bz1	A	ATGC	AG	AG	G	T	A	C	0	ATG	T	G	A	C	G	G	A	ATC	G	ATGC
ch1	A	TGC	G	G	G	T	A	C	0	ATGC	0	G	A	0	0	0	A	C	AG	AG
me1	A	GC	G	G	G	T	A	C	C	ATGC	T	G	A	C	G	G	A	TC	AG	ATGC
ur1	0	ATGC	0	0	0	0	0	0	0	ATG	0	0	A	0	0	0	0	ATGC	G	ATGC
ur2	0	ATGC	0	0	G	0	0	0	0	0	0	G	A	0	0	0	A	ATGC	G	ATGC
pe1	A	ATG	G	G	G	AT	A	C	C	ATGC	T	G	A	C	G	G	A	TC	AG	AG
pe2	A	AG	G	G	G	T	A	C	C	A	T	G	A	C	G	TG	AT	AC	AG	AG
pe3	A	G	G	G	G	T	A	C	C	A	T	G	A	C	G	G	A	AC	AG	AG
so1	A	AG	G	G	G	T	0	0	0	0	T	G	A	0	G	G	A	C	G	AG
so2	A	AG	0	G	G	T	A	C	C	0	T	G	A	C	G	G	A	C	AG	AG
so6	A	AG	G	G	G	T	A	C	C	A	T	G	A	C	G	G	A	TC	AG	G
so7	A	G	G	G	G	T	A	C	C	A	T	G	A	C	G	G	A	C	AG	G
so8	A	G	G	G	G	T	A	0	C	0	0	G	A	0	G	0	0	C	AG	ATG
so9	A	AG	G	AG	G	T	A	C	C	A	T	G	A	C	AG	AG	A	C	AG	ATG
br1	0	A	0	0	G	0	A	C	0	0	0	0	0	0	G	G	0	C	0	AG
my3	0	G	0	0	0	0	0	0	0	0	0	0	0	0	G	0	0	AC	0	AG
my6	0	G	0	0	0	0	0	0	0	A	0	0	0	0	0	0	0	AC	0	AG
my7	0	G	0	0	0	0	0	0	0	A	0	0	0	0	G	0	0	AC	0	AG
ap1	G	G	0	0	0	0	A	C	0	ATG	0	A	0	0	0	0	0	C	0	G
cm1	G	0	0	0	0	C	A	0	0	ATG	0	A	0	0	0	0	0	0	0	G
cm2	G	0	0	0	0	C	A	0	0	ATGC	0	A	0	0	0	0	0	0	0	0
dp1	G	0	0	0	0	C	0	C	0	ATGC	0	0	0	0	0	0	0	0	0	0
dp2	0	0	0	0	0	0	0	0	T	0	0	0	0	0	0	0	0	C	0	G
dp3n	G	0	0	0	0	C	0	C	0	ATGC	0	0	0	0	0	0	0	0	0	0
gb1	0	G	G	G	G	T	A	GC	T	0	T	G	A	C	0	0	0	TC	G	AG
ha1	G	0	0	0	0	C	0	0	0	TGC	0	0	0	0	0	0	0	C	0	0
hu1	0	0	0	0	0	0	0	0	0	0	0	0	0	0	0	0	0	0	0	0
pr1	G	0	0	0	0	0	0	0	0	ATGC	0	0	0	0	0	0	0	0	0	0
rr1	0	0	0	G	0	T	A	C	C	0	C	G	0	0	0	0	0	C	0	AG
rr2	0	0	0	G	0	T	A	C	C	0	TC	G	0	0	0	0	0	C	0	ATG
rt1	G	0	0	0	0	0	0	0	0	0	0	0	0	0	0	0	0	0	0	0
rt2	G	0	0	0	0	0	0	0	0	0	0	0	0	0	0	0	0	0	0	0
rt3	G	0	0	0	0	0	0	0	0	0	0	0	0	0	0	0	0	0	0	0
su1	0	0	0	0	0	0	0	0	0	0	0	0	0	0	0	0	0	0	0	0
b10	0	0	0	0	0	0	0	0	0	0	0	0	0	0	0	0	0	0	0	0
b11	0	0	0	0	0	0	0	0	0	0	0	0	0	0	0	0	0	0	0	0
b12	0	0	0	0	0	0	0	0	0	0	0	0	0	0	0	0	0	0	0	0
b13	0	0	0	0	0	0	0	0	0	0	0	0	0	0	0	0	0	0	0	0
b14	0	0	0	0	0	0	0	0	0	0	0	0	0	0	0	0	0	0	0	0
b15	0	0	0	0	0	0	0	0	0	0	0	0	0	0	0	0	0	0	0	0
b16	0	0	0	0	0	0	0	0	0	0	0	0	0	0	0	0	0	0	0	0
b17	0	0	0	0	0	0	0	0	0	0	0	0	0	0	0	0	0	0	0	0
b18	0	0	0	0	0	0	0	0	0	0	0	0	0	0	0	0	0	0	0	0
b19	0	0	0	0	0	0	0	0	0	0	0	0	0	0	0	0	0	0	0	0
b1	0	0	0	0	0	0	0	0	0	0	0	0	0	0	0	0	0	0	0	0
b20	0	0	0	0	0	0	0	0	0	0	0	0	0	0	0	0	0	0	0	0
b21	0	0	0	0	0	0	0	0	0	0	0	0	0	0	0	0	0	0	0	0
b22	0	0	0	0	0	0	0	0	0	0	0	0	0	0	0	0	0	0	0	0
b23	0	0	0	0	0	0	0	0	0	0	0	0	0	0	0	0	0	0	0	0
b24	0	0	0	0	0	0	0	0	0	0	0	0	0	0	0	0	0	0	0	0
b25	0	0	0	0	0	0	0	0	0	0	0	0	0	0	0	0	0	0	0	0
b26	0	0	0	0	0	0	0	0	0	0	0	0	0	0	0	0	0	0	0	0
b27	0	0	0	0	0	0	0	0	0	0	0	0	0	0	0	0	0	0	0	0
b28	0	0	0	0	0	0	0	0	0	0	0	0	0	0	0	0	0	0	0	0
b29	0	0	0	0	0	0	0	0	0	0	0	0	0	0	0	0	0	0	0	0
b2	0	0	0	0	0	0	0	0	0	0	0	0	0	0	0	0	0	0	0	0
b30	0	0	0	0	0	0	0	0	0	0	0	0	0	0	0	0	0	0	0	0
b31	0	0	0	0	0	0	0	0	0	0	0	0	0	0	0	0	0	0	0	0
b32	0	0	0	0	0	0	0	0	0	0	0	0	0	0	0	0	0	0	0	0
b33	0	0	0	0	0	0	0	0	0	0	0	0	0	0	0	0	0	0	0	0
b34	0	0	0	0	0	0	0	0	0	0	0	0	0	0	0	0	0	0	0	0
b35	0	0	0	0	0	0	0	0	0	0	0	0	0	0	0	0	0	0	0	0
b36	0	0	0	0	0	0	0	0	0	0	0	0	0	0	0	0	0	0	0	0
b37	0	0	0	0	0	0	0	0	0	0	0	0	0	0	0	0	0	0	0	0
b38	0	0	0	0	0	0	0	0	0	0	0	0	0	0	0	0	0	0	0	0
b39	0	0	0	0	0	0	0	0	0	0	0	0	0	0	0	0	0	0	0	0
b3	0	0	0	0	0	0	0	0	0	0	0	0	0	0	0	0	0	0	0	0
b40	0	0	0	0	0	0	0	0	0	0	0	0	0	0	0	0	0	0	0	0
b42	0	0	0	0	0	0	0	0	0	0	0	0	0	0	0	0	0	0	0	0
b43	0	0	0	0	0	0	0	0	0	0	0	0	0	0	0	0	A	0	0	0
b44	0	0	0	0	0	0	0	0	0	0	0	0	0	0	0	0	0	0	0	0
b45	0	0	0	0	0	0	0	0	0	0	0	0	0	0	0	0	0	0	0	0
b46	0	0	0	0	0	0	0	0	0	0	0	0	0	0	0	0	0	0	0	0
b47	0	0	0	0	0	0	0	0	0	0	0	0	0	0	0	0	0	0	0	0
b48	0	0	0	0	0	0	0	0	0	0	0	0	0	0	0	0	0	0	0	0
b49	0	0	0	0	0	0	0	0	0	0	0	0	0	0	0	0	0	0	0	0
b4	0	0	0	0	0	0	0	0	0	0	0	0	0	0	0	0	0	0	0	0
b50	0	0	0	0	0	0	0	0	0	0	0	0	0	0	0	0	0	0	0	0
b5	0	0	0	0	0	0	0	0	0	0	0	0	0	0	0	0	0	0	0	0
b6	0	0	0	0	0	0	0	0	0	0	0	0	0	0	0	0	0	0	0	0
b7	0	0	0	0	C	0	0	0	0	0	0	0	0	0	0	0	0	0	0	0
b8	0	0	0	0	0	0	0	0	0	0	0	0	0	0	0	0	0	0	0	0
b9	0	0	0	0	0	0	0	0	0	0	0	0	0	0	0	0	0	0	0	0
d10	G	0	0	0	0	0	0	0	0	0	C	G	0	0	0	0	0	0	0	0
d11	G	0	0	0	0	0	0	C	0	0	0	0	0	0	0	0	0	0	0	0
d12	0	0	0	0	0	0	0	0	0	0	0	0	0	0	0	0	0	0	0	0
d13	G	0	0	0	G	0	0	0	0	0	0	0	0	0	0	0	0	0	0	0
d14	0	0	0	0	0	0	0	0	0	0	0	0	0	0	0	0	0	0	0	0
d15	G	0	0	0	0	0	0	0	0	0	0	0	0	0	0	0	0	0	0	0
d16	G	0	0	0	0	0	0	0	0	0	0	0	0	0	0	0	0	0	0	0
d17	0	0	0	0	0	0	0	0	0	0	0	0	0	0	0	0	0	0	0	0
d18	0	0	0	0	0	0	0	0	T	0	0	0	0	0	0	0	0	0	0	0
d19	0	0	0	0	G	0	0	0	0	0	0	0	0	0	0	0	0	0	0	0
d1	0	0	0	0	0	0	0	0	T	0	0	0	0	0	0	0	0	0	0	0
d20	0	0	0	0	0	0	0	0	0	0	0	0	0	A	0	0	0	0	0	0
d21	0	0	0	0	0	0	0	0	0	0	0	0	0	0	0	0	0	0	0	0
d22	0	0	0	0	0	0	0	0	0	0	0	0	0	0	0	0	G	0	0	0
d23	0	0	0	0	0	0	0	0	0	0	0	0	0	0	0	0	A	0	0	0
d24	0	0	0	0	0	0	0	0	0	0	0	0	0	0	0	0	0	0	0	0
d25	0	0	0	0	0	0	0	0	T	0	0	0	0	0	0	0	0	0	0	0
d26	0	0	0	0	0	0	0	0	T	0	0	0	0	0	0	0	0	0	0	0
d27	G	0	0	0	0	0	0	0	0	0	0	G	0	0	0	0	0	0	0	0
d28	0	0	0	0	0	0	0	0	T	0	0	0	0	0	0	0	0	0	0	0
d29	0	0	0	0	0	0	0	C	0	0	0	0	0	0	0	0	0	0	0	0
d2	G	0	0	0	0	0	0	0	0	0	0	0	0	0	0	0	0	0	0	0
d3	G	0	0	0	0	0	0	0	0	0	0	0	0	0	0	0	0	0	0	0
d4	0	0	0	0	0	0	0	0	0	0	0	0	0	0	0	0	0	0	0	0
d5	G	0	0	0	G	0	0	0	0	0	0	0	0	0	0	0	0	0	0	0
d6	0	0	0	0	0	0	0	0	0	0	0	0	0	0	0	0	0	0	0	0
d7	G	0	0	0	0	0	0	0	0	0	0	0	0	0	0	0	0	0	0	0
d8	G	0	0	0	0	0	0	0	0	0	0	G	0	0	0	0	0	0	0	0
d9	0	0	0	0	0	0	0	0	0	0	0	0	0	0	0	0	0	0	0	0
F10	0	0	0	0	0	0	0	0	0	0	0	0	0	0	0	0	0	0	0	0
F11	0	0	0	0	0	0	0	0	0	0	0	0	0	0	0	0	0	0	0	0
F12	0	0	0	0	0	0	0	0	0	0	0	0	0	0	0	0	0	0	0	0
F13	0	0	0	0	0	0	0	0	0	0	0	0	0	0	0	0	0	0	0	0
F14	0	0	0	0	0	0	0	0	0	0	0	0	0	0	0	0	0	0	0	0
F15	0	0	0	0	0	0	0	0	0	0	0	0	0	0	0	0	0	0	0	0
F16	0	0	0	0	0	0	0	0	0	0	0	0	0	0	0	0	0	0	0	0
F17	0	0	0	0	0	0	0	0	0	0	0	0	0	0	0	0	0	0	0	0
F18	0	0	0	0	0	0	0	0	0	0	0	0	0	0	0	0	0	0	0	0
F19	0	0	0	0	0	0	0	0	0	0	0	0	0	0	0	0	0	0	0	0
F1	0	0	0	0	0	0	0	0	0	0	0	0	0	0	0	0	0	0	0	0
F20	0	0	0	0	0	0	0	0	0	0	0	0	0	0	0	0	0	0	0	0
F21	0	0	0	0	0	0	0	0	0	0	0	0	0	0	0	0	0	0	0	0
F22	0	0	0	0	0	0	0	0	0	0	0	0	0	0	0	0	0	0	0	0
F23	0	0	0	0	0	0	0	0	0	0	0	0	0	0	0	0	0	0	0	0
F24	0	0	0	0	0	0	0	0	0	0	0	0	0	0	0	0	0	0	0	0
F25	0	0	0	0	0	0	0	0	0	0	0	0	0	0	0	0	0	0	0	0
F26	0	0	0	0	0	0	0	0	0	0	0	0	0	0	0	0	0	0	0	0
F27	0	0	0	0	0	0	0	0	0	0	0	0	0	0	0	0	0	0	0	0
F28	0	0	0	0	0	0	0	0	0	0	0	0	0	0	0	0	0	0	0	0
F29	0	0	0	0	0	0	0	0	0	0	0	0	0	0	0	0	0	0	0	0
F2	0	0	0	0	0	0	0	0	0	0	0	0	0	0	0	0	0	0	0	0
F30	0	0	0	0	0	0	0	0	0	0	0	0	0	0	0	0	0	0	0	0
F31	0	0	0	0	0	0	0	0	0	0	0	0	0	0	0	0	0	0	0	0
F32	0	0	0	0	0	0	0	0	0	0	0	0	0	0	0	0	0	0	0	0
F33	0	0	0	0	0	0	0	0	0	0	0	0	0	0	0	0	0	0	0	0
F34	0	0	0	0	0	0	0	0	0	0	0	0	0	0	0	0	0	0	0	0
F35	0	0	0	0	0	0	0	0	0	0	0	0	0	0	0	0	0	0	0	0
F36	0	0	0	0	0	0	0	0	0	0	0	0	0	0	0	0	0	0	0	0
F37	0	0	0	0	0	0	0	0	0	0	0	0	0	0	0	0	0	0	0	0
F38	0	0	0	0	0	0	0	0	0	0	0	0	0	0	0	0	0	0	0	0
F39	0	0	0	0	0	0	0	0	0	0	0	0	0	0	0	0	0	0	0	0
F3	0	0	0	0	0	0	0	0	0	0	0	0	0	0	0	0	0	0	0	0
F40	0	0	0	0	0	0	0	0	0	0	0	0	0	0	0	0	0	0	0	0
F41	0	0	0	0	0	0	0	0	0	0	0	0	0	0	0	0	0	0	0	0
F42	0	0	0	0	0	0	0	0	0	0	0	0	0	0	0	0	0	0	0	0
F43	0	0	0	0	0	0	0	0	0	0	0	0	0	0	0	0	0	0	0	0
F44	0	0	0	0	0	0	0	0	0	0	0	0	0	0	0	0	0	0	0	0
F45	0	0	0	0	0	0	0	0	0	0	0	0	0	0	0	0	0	0	0	0
F46	0	0	0	0	0	0	0	0	0	0	0	0	0	0	0	0	0	0	0	0
F47	0	0	0	0	A	0	0	0	0	0	0	0	0	0	0	0	0	0	0	0
F48	0	0	0	0	0	0	0	0	0	0	0	0	0	0	0	0	0	0	0	0
F49	0	0	0	0	0	0	0	0	0	0	0	0	0	0	0	0	0	0	0	0
F4	0	0	0	0	0	0	0	0	0	0	0	0	0	0	0	0	0	0	0	0
F50	0	0	0	0	0	0	0	0	0	0	0	0	0	0	0	0	0	0	0	0
F51	0	0	0	0	0	0	0	0	0	0	0	0	0	0	0	0	0	0	0	0
F52	0	0	0	0	0	0	0	0	0	0	0	0	0	0	0	0	0	0	0	0
F53	0	0	0	0	0	0	0	0	0	0	0	0	0	0	0	0	0	0	0	0
F54	0	0	0	0	0	0	0	0	0	0	0	0	0	0	0	0	0	0	0	0
F55	0	0	0	0	0	0	0	0	0	0	0	0	0	0	0	0	0	0	0	0
F56	0	0	0	0	0	0	0	0	0	0	0	0	0	0	0	0	0	0	0	0
F57	0	0	0	0	0	0	0	0	0	0	0	0	0	0	0	0	0	0	0	0
F58	0	0	0	0	0	0	0	0	0	0	0	0	0	0	0	0	0	0	0	0
F5	0	0	0	0	0	0	0	0	0	0	0	0	0	0	0	0	0	0	0	0
F6	0	0	0	0	0	0	0	0	0	0	0	0	0	0	0	0	0	0	0	0
F7	0	0	0	0	0	0	0	0	0	0	0	0	0	0	0	0	0	0	0	0
F8	0	0	0	0	0	0	0	0	0	0	0	0	0	0	0	0	0	0	0	0
F9	0	0	0	0	0	0	0	0	0	0	0	0	0	0	0	0	0	0	0	0
F59	0	0	0	0	0	0	0	0	0	0	0	0	0	0	0	0	0	0	0	0
F60	0	0	0	0	0	0	0	0	0	0	0	0	0	0	0	0	0	0	0	0
F61	0	0	0	0	0	0	0	0	0	0	0	0	0	0	0	0	0	0	0	0
F62	0	0	0	0	0	0	0	0	0	0	0	0	0	0	0	0	0	0	0	0
F63	0	0	0	0	0	0	0	0	0	0	0	0	0	0	0	0	0	0	0	0
F64	0	0	0	0	0	0	0	0	0	0	0	0	0	0	0	0	0	0	0	0
F65	0	0	0	0	0	0	0	0	0	0	0	0	0	0	0	0	0	0	0	0
F66	0	0	0	0	0	0	0	0	0	0	0	0	0	0	0	0	0	0	0	0
F67	0	0	0	0	0	0	0	0	0	0	0	0	0	0	0	0	0	0	0	0
F68	0	0	0	0	0	0	0	0	0	0	0	0	0	0	0	0	0	0	0	0
F69	0	0	0	0	0	0	0	0	0	0	0	0	0	0	0	0	0	0	0	0
F70	0	0	0	0	0	0	0	0	0	0	0	0	0	0	0	0	0	0	0	0
F71	0	0	0	0	0	0	0	0	0	0	0	0	0	0	0	0	0	0	0	0
F72	0	0	0	0	0	0	0	0	0	0	0	0	0	0	0	0	0	0	0	0
F73	0	0	0	0	0	0	0	0	0	0	0	0	0	0	0	0	0	0	0	0
F74	0	0	0	0	0	0	0	0	0	0	0	0	0	0	0	0	0	0	0	0
F75	0	0	0	0	0	0	0	0	0	0	0	0	0	0	0	0	0	0	0	0
F76	0	0	0	0	0	0	0	0	0	0	0	0	0	0	0	0	0	0	0	0
F77	0	0	0	0	0	0	0	0	0	0	0	0	0	0	0	0	0	0	0	0
F78	0	0	0	0	0	0	0	0	0	0	0	0	0	0	0	0	0	0	0	0
F79	0	0	C	0	0	0	0	0	0	0	0	0	0	0	0	0	0	0	0	0
F80	0	0	0	0	0	0	0	0	0	0	0	0	0	0	0	0	0	0	0	0
lc1	0	0	0	0	0	0	0	0	0	ATGC	0	0	0	0	0	0	0	C	0	G
lc5	0	0	0	0	0	0	0	0	0	0	0	0	0	0	0	0	0	0	0	0
lm1	0	0	0	0	0	0	0	0	0	0	0	0	0	0	0	0	0	0	0	0
lu1	0	0	0	0	0	0	0	0	0	0	0	0	0	0	0	0	0	0	0	0
lu3	0	0	0	A	A	0	0	0	0	0	0	0	0	0	0	0	0	AG	0	0
lu4	0	0	0	0	0	0	0	0	0	ATGC	0	0	0	0	0	0	0	0	0	0
x19	0	0	0	0	0	0	0	0	0	0	0	0	0	0	0	0	0	0	0	0
st1	0	0	0	0	0	0	0	0	0	ATGC	0	0	0	0	0	0	0	0	0	0
L10	0	0	0	0	0	0	0	0	0	0	0	0	0	0	0	0	0	0	0	0
L11	0	0	0	0	0	0	0	0	0	0	0	0	0	0	0	0	0	0	0	0
L12	0	0	0	0	0	0	0	0	0	0	0	0	0	0	0	0	0	0	0	0
L13	G	0	0	0	0	0	0	0	0	0	0	0	0	0	0	0	0	0	0	0
L14	G	0	0	0	0	0	0	0	0	0	0	0	0	0	0	0	0	0	0	0
L15	G	0	0	0	0	0	0	0	0	0	0	0	0	0	0	0	0	0	0	0
L16	0	0	0	0	0	0	0	0	0	0	0	0	0	0	0	0	0	0	0	0
L17	G	0	0	0	0	0	0	0	0	0	0	0	0	0	0	0	0	0	0	0
L18	0	0	0	0	0	0	0	0	0	0	0	0	0	0	0	0	0	0	0	0
L19	0	0	0	0	0	0	0	0	0	0	0	0	0	0	0	0	0	0	0	0
L1	0	0	0	0	0	0	0	0	0	0	0	A	0	0	0	0	0	0	0	0
L20	G	0	0	0	0	0	0	0	0	0	0	0	0	0	0	0	0	0	0	0
L21	G	0	0	0	0	0	0	0	0	0	0	0	0	0	0	0	0	0	0	0
L2	G	0	0	0	0	0	0	0	0	0	0	0	0	0	0	0	0	0	0	0
L3	G	0	0	0	0	0	0	0	0	0	0	0	0	0	0	0	0	0	0	0
L4	0	0	0	0	0	0	0	0	0	0	0	0	0	0	0	0	0	0	0	0
L5	0	0	0	0	0	0	0	0	0	0	0	A	0	0	0	0	0	0	0	0
L6	G	0	0	0	0	0	0	0	0	0	0	0	0	0	0	0	0	0	0	0
L7	0	0	0	0	0	0	0	0	0	0	0	0	0	0	0	0	0	0	0	0
L8	0	0	0	0	0	0	0	0	0	0	0	0	0	0	0	0	0	0	0	0
L9	0	0	0	0	0	0	0	0	0	0	0	0	0	0	0	0	0	0	0	0
L22	G	0	0	0	0	0	0	0	0	0	0	0	0	0	0	0	0	0	0	0
L23	0	0	0	0	0	0	0	0	0	0	0	0	0	0	0	0	0	0	0	0
L24	0	0	0	0	0	0	0	0	0	0	0	0	0	0	0	0	0	0	0	0
L25	G	0	0	0	0	0	0	0	0	0	0	0	0	0	0	0	0	0	0	0
L26	0	0	0	0	0	0	0	0	T	0	0	0	0	0	0	0	0	0	0	0
L27	0	0	0	0	0	0	0	0	A	0	0	0	0	0	0	0	0	0	0	0
L28	0	0	0	0	0	0	0	0	0	0	0	0	0	0	0	0	0	0	0	0
L29	0	0	0	0	0	0	0	0	0	0	0	0	0	0	0	0	0	0	0	0
L30	0	0	0	0	0	0	0	0	0	0	0	0	0	0	0	0	0	0	0	0
L31	0	0	0	0	0	0	0	0	0	0	0	0	0	0	0	0	0	0	0	0
L32	0	0	0	0	0	0	0	0	0	0	0	0	0	0	0	0	0	0	0	0
L33	G	0	0	0	0	0	0	0	0	0	0	0	0	0	0	0	0	0	0	0
L34	G	0	0	0	0	0	0	0	0	0	0	0	0	0	0	0	0	0	0	0
L35	G	0	0	0	0	0	0	C	0	0	0	0	0	0	0	0	0	0	0	0
L36	0	0	0	0	0	0	0	0	0	0	0	0	0	0	0	0	0	0	0	0
L37	G	0	0	0	0	0	0	0	0	0	0	0	0	0	0	0	0	0	0	0
L38	0	0	0	0	0	0	0	0	0	0	0	0	0	0	0	0	0	0	0	0
L39	0	0	0	0	0	0	0	0	T	0	0	0	0	0	0	0	0	0	0	0
L40	0	0	0	0	0	0	0	0	0	0	0	0	0	0	0	0	0	0	0	0
L41	G	0	0	0	0	0	0	0	0	0	0	0	0	0	0	0	0	0	0	0
L42	0	0	0	0	0	0	0	0	0	0	0	0	0	0	0	0	0	0	0	0
R10	0	0	0	0	0	0	0	0	0	0	0	0	0	0	0	0	0	0	0	0
R11	0	0	0	0	0	0	0	0	0	0	0	0	0	0	0	0	0	0	0	0
R12	0	0	0	0	0	0	0	0	0	0	0	0	0	0	0	0	0	0	0	0
R13	0	0	0	0	0	0	0	0	0	0	0	0	0	0	0	0	0	0	0	0
R14	0	0	0	0	0	0	0	0	0	0	0	0	0	0	0	0	0	0	0	0
R15	0	0	0	0	0	0	0	0	0	0	0	0	0	0	0	0	0	0	0	0
R16	0	0	0	0	0	0	0	0	0	0	0	0	0	0	0	0	0	0	0	0
R17	0	0	0	0	0	0	0	0	0	0	0	0	0	0	0	0	0	0	0	0
R18	0	0	0	0	0	0	0	0	0	0	0	0	0	0	0	0	0	0	0	0
R19	0	0	0	0	0	0	0	0	0	G	0	0	0	0	0	0	0	0	0	0
R1	0	0	0	0	0	0	0	0	0	0	0	0	0	0	0	0	0	0	0	0
R2	0	0	0	0	0	0	0	0	0	0	0	0	0	0	0	0	0	0	0	0
R3	0	0	0	0	0	0	0	0	0	0	0	0	0	0	0	0	0	0	0	0
R4	0	0	0	0	0	0	0	0	0	0	0	0	0	0	0	0	0	0	0	0
R5	0	0	0	0	0	0	0	0	0	0	0	0	0	0	0	0	0	0	0	0
R6	0	0	0	0	0	0	0	0	0	0	0	0	0	0	0	0	0	0	0	0
R7	0	0	0	0	0	0	0	0	0	0	0	0	0	0	0	0	0	0	0	0
R8	0	0	0	0	0	0	0	0	0	0	0	0	0	0	0	0	0	0	0	0
R9	0	0	0	0	0	0	0	0	0	0	0	0	0	0	0	0	0	0	0	0
x10	0	0	0	0	0	0	0	0	0	0	0	0	0	0	0	0	0	0	0	0
x11	0	0	0	0	0	0	0	0	0	0	0	0	0	0	0	0	0	0	0	0
x12	0	0	0	0	0	0	0	0	0	0	0	0	0	0	0	0	0	0	0	0
x13	G	0	0	0	0	0	0	0	0	0	0	0	0	0	0	0	0	0	0	0
x14	G	0	0	0	0	0	0	0	0	0	0	0	0	0	0	0	0	0	0	0
x15	0	0	0	0	0	0	0	0	0	0	0	0	0	0	0	0	0	0	0	0
x16	0	0	0	0	0	0	0	0	0	0	0	C	0	0	0	0	0	0	0	0
x17	G	0	0	0	0	0	0	0	0	0	0	0	0	0	0	0	0	0	0	0
x18	G	0	0	0	0	0	0	0	0	0	0	0	0	0	0	0	0	0	0	0
x1	G	0	0	0	0	0	0	0	0	0	0	G	0	0	0	0	0	0	0	0
x20	0	0	0	0	0	0	0	0	0	0	0	0	0	0	0	0	0	0	0	0
x21	0	0	0	0	0	0	0	0	0	0	0	0	0	0	0	0	0	0	0	0
x22	0	0	0	0	0	0	0	0	0	0	0	0	0	0	0	0	0	0	0	0
x2	G	0	0	0	0	0	0	0	0	0	0	0	0	0	0	0	0	0	0	0
x3	0	0	0	0	0	0	0	0	0	0	0	G	0	0	0	0	0	0	0	0
x4	0	0	0	0	0	0	0	0	T	0	0	0	0	0	0	0	0	0	0	0
x5	G	0	0	0	0	0	0	0	0	0	0	0	0	0	0	0	0	0	0	0
x6	0	0	0	0	0	0	0	0	0	0	0	0	0	0	0	0	0	0	0	0
x7	0	0	0	0	0	0	0	0	0	0	0	0	0	0	0	0	0	0	0	0
x8	0	0	0	0	0	0	0	0	0	0	0	0	0	0	0	0	0	0	0	0
x9	0	0	0	0	0	0	0	0	0	0	0	0	0	0	0	0	0	0	0	0
