# Supplementary material for: The Evolution of Cognitive Abilities in Marine Animals: Insights from Cognition Gene Polymorphism in Coelacanths and Lungfish
Source: Research Square preprint supplement (doi:10.21203/rs.3.rs-6373286/v1), 2025-04-25
Supplement: Supplementary file 4 [file d0d54beee01c8c8f9da706a4.xlsx]

## Sheet: Sheet1
rsID	gene	GRCh38	Clinical significance	GRCh37	Alleles	Functional Consequence
rs201544418	NRXN1	2:51032514	uncertain-significance	2:51259652	G>A,C,T	upstream_transcript_variant,2KB_upstream_variant
rs886056179	NRXN1	2:51032454	uncertain-significance	2:51259592	C>T	upstream_transcript_variant,2KB_upstream_variant
rs201539806	NRXN1	2:51028181	likely-benign	2:51255319	C>A,T	synonymous_variant,genic_upstream_transcript_variant,coding_sequence_variant
rs772333323	NRXN1	2:51027716	uncertain-significance	2:51254854	G>A,C	genic_upstream_transcript_variant,missense_variant,synonymous_variant,coding_sequence_variant
rs2303298	NRXN1	2:50623548	benign	2:50850686	G>A	genic_downstream_transcript_variant,coding_sequence_variant,genic_upstream_transcript_variant,synonymous_variant,intron_variant
rs886056171	NRXN1	2:50538649	conflicting-interpretations-of-pathogenicity	2:50765787	G>C	genic_upstream_transcript_variant,genic_downstream_transcript_variant,intron_variant
rs750156118	NRXN1	2:50506601	likely-benign	2:50733739	A>G,T	genic_upstream_transcript_variant,coding_sequence_variant,synonymous_variant,genic_downstream_transcript_variant
rs2091595186	NRXN1	2:50496027	uncertain-significance	2:50723165	A>G	missense_variant,genic_upstream_transcript_variant,genic_downstream_transcript_variant,coding_sequence_variant
rs562219421	NRXN1	2:50346869	likely-benign	2:50574007	T>C	synonymous_variant,intron_variant,coding_sequence_variant,genic_downstream_transcript_variant,genic_upstream_transcript_variant
rs761776814	NRXN1	2:50053494	uncertain-significance	2:50280632	T>C	coding_sequence_variant,genic_downstream_transcript_variant,genic_upstream_transcript_variant,missense_variant
rs760815320	NRXN1	2:49922144	uncertain-significance	2:50149282	C>T	coding_sequence_variant,genic_downstream_transcript_variant,missense_variant
rs541005670	NRXN1	2:49918598	uncertain-significance	2:50145736	A>T	genic_downstream_transcript_variant,3_prime_UTR_variant
rs91435	THSD7B	2:137597267	not-provided	2:138354837	C>A	intron_variant
rs35967139	THSD7B	2:137076879	not-provided	2:137834449	A>G	intron_variant
rs114612136	THSD7B	2:137153815	not-provided	2:137911385	C>A	intron_variant
rs149172693	THSD7B	2:137228729	not-provided	2:137986299	A>G	intron_variant
rs189224302	THSD7B	2:136795747	not-provided	2:137553317	G>A	genic_upstream_transcript_variant,intron_variant
rs373333594	THSD7B	2:136853863	not-provided	2:137611433	A>G	intron_variant,genic_upstream_transcript_variant
rs534053420	THSD7B	2:137338056	not-provided	2:138095626	G>C,T	intron_variant
rs962699493	THSD7B	2:137376502	not-provided	2:138134072	G>A	intron_variant
rs1162258857	THSD7B	2:137592177	not-provided	2:138349747	C>T	intron_variant
rs1280704421	THSD7B	2:137610239	not-provided	2:138367809	T>C	intron_variant
rs1398759851	THSD7B	2:137675196	not-provided	2:138432766	C>A	intron_variant
rs1573714708	THSD7B	2:136926530	not-provided	2:137684100	A>T	intron_variant
rs1342963824	ARHGAP11B	15:30624458	not-provided	15:30916661	C>A	upstream_transcript_variant,intron_variant,2KB_upstream_variant
rs2060186953	ARHGAP11B	15:30624912	not-provided	15:30917115	G>A,T	2KB_upstream_variant,intron_variant,upstream_transcript_variant
rs1473937662	ARHGAP11B	15:30625461	not-provided	15:30917664	A>G	non_coding_transcript_variant,upstream_transcript_variant,2KB_upstream_variant
rs921027344	ARHGAP11B	15:30625848	not-provided	15:30918051	T>C	2KB_upstream_variant,upstream_transcript_variant
rs2140884449	ARHGAP11B	15:30626222	not-provided	15:30918425	T>G	non_coding_transcript_variant,5_prime_UTR_variant,2KB_upstream_variant,upstream_transcript_variant
rs1161395884	ARHGAP11B	15:30628220	not-provided	15:30920423	A>C,G	intron_variant
rs2060245516	ARHGAP11B	15:30631557	not-provided	15:30923760	A>G	intron_variant
rs374363097	ARHGAP11B	15:30635223	not-provided	15:30927426	T>C	intron_variant
rs942105401	ARHGAP11B	15:30638963	not-provided	15:30931166	A>G	intron_variant,genic_downstream_transcript_variant,downstream_transcript_variant
rs1021221929	ARHGAP11B	15:30643285	not-provided	15:30935488	T>C	intron_variant,genic_downstream_transcript_variant
rs2060352325	ARHGAP11B	15:30646851	not-provided	15:30939054	C>T	genic_downstream_transcript_variant,intron_variant,genic_upstream_transcript_variant
rs2060373053	ARHGAP11B	15:30649462	not-provided	15:30941665	A>G	genic_upstream_transcript_variant,500B_downstream_variant,intron_variant,downstream_transcript_variant
rs759485449	ASPM	1:197142463	uncertain-significance,pathogenic	1:197111593	G>A,C	missense_variant,stop_gained,coding_sequence_variant
rs1451306414	ASPM	1:197102257	pathogenic	1:197071387	G>A,C,T	missense_variant,synonymous_variant,stop_gained,intron_variant,coding_sequence_variant
rs774143329	ASPM	1:197093060	pathogenic-likely-pathogenic	1:197062190	G>A,T	synonymous_variant,coding_sequence_variant,stop_gained
rs77424753	ASPM	1:197090366	pathogenic	1:197059496	C>A,T	missense_variant,coding_sequence_variant,stop_gained
rs587783211	ASPM	1:197086966	pathogenic	1:197056096	G>A	coding_sequence_variant,stop_gained
rs587783215	ASPM	1:197143114	likely-pathogenic,pathogenic	1:197112244	G>A,C,T	coding_sequence_variant,missense_variant,stop_gained
rs41265225	ASPM	1:197084166	benign-likely-benign,uncertain-significance	1:197053296	A>G	3_prime_UTR_variant
rs199422171	ASPM	1:197102519	not-provided	1:197071649	T>-	coding_sequence_variant,frameshift_variant,intron_variant
rs199422181	ASPM	1:197100583	uncertain-significance,not-provided	1:197069713	G>A,T	coding_sequence_variant,stop_gained,intron_variant,missense_variant
rs199422200	ASPM	1:197089929	not-provided	1:197059059	C>A	splice_donor_variant
rs566459725	CHRM2	7:136869177	likely-benign	7:136553924	G>A,C	genic_upstream_transcript_variant,upstream_transcript_variant,intron_variant
rs139124053	CHRM2	7:136869276	benign	7:136554023	G>A	5_prime_UTR_variant,genic_upstream_transcript_variant
rs79607027	CHRM2	7:136992195	likely-benign	7:136676942	C>T	intron_variant,5_prime_UTR_variant
rs1057524597	CHRM2	7:136992262	likely-benign	7:136677009	A>T	5_prime_UTR_variant,intron_variant
rs324651	CHRM2	7:137014514	benign	7:136699261	G>T	intron_variant
rs1805069679	CHRM2	7:137014909	uncertain-significance	7:136699656	C>A,G	coding_sequence_variant,missense_variant,intron_variant
rs1805074915	CHRM2	7:137014966	uncertain-significance	7:136699713	G>T	coding_sequence_variant,missense_variant,intron_variant
rs1440850408	CHRM2	7:137015092	uncertain-significance	7:136699839	C>G	coding_sequence_variant,missense_variant,intron_variant
rs141951417	CHRM2	7:137015414	benign	7:136700161	T>C	coding_sequence_variant,synonymous_variant,intron_variant
rs774760812	CHRM2	7:137015497	uncertain-significance	7:136700244	G>A,T	intron_variant,coding_sequence_variant,missense_variant
rs76394680	CHRM2	7:137015556	benign-likely-benign,benign	7:136700303	G>A	coding_sequence_variant,intron_variant,missense_variant
rs114941053	DAB1	1:57010703	benign,uncertain-significance	1:57476376	C>A,T	genic_downstream_transcript_variant,missense_variant,coding_sequence_variant,non_coding_transcript_variant,intron
rs183171115	DAB1	1:57014875	likely-benign	1:57480548	G>A,C,T	2KB_upstream_variant,intron_variant,genic_downstream_transcript_variant,500B_downstream_variant,upstream_transcript_variant,
rs34466938	DAB1	1:58539094	benign	1:59004766	G>A,T	missense_variant,synonymous_variant,intron_variant,coding_sequence_variant,genic_upstream_transcript_variant
rs17117702	DAB1	1:58536647	benign	1:59002319	A>G	synonymous_variant,intron_variant,genic_upstream_transcript_variant,coding_sequence_variant
rs75129043	DAB1	1:58534181	benign	1:58999853	T>C	genic_upstream_transcript_variant,missense_variant,coding_sequence_variant,intron_variant
rs145999889	DAB1	1:58480975	likely-benign	1:58946647	G>A,T	coding_sequence_variant,intron_variant,genic_upstream_transcript_variant,missense_variant
rs199645763	DAB1	1:57290956	likely-benign	1:57756628	A>G,T	intron_variant
rs1855377	DAB1	1:57136638	benign	1:57602311	C>A,T	coding_sequence_variant,missense_variant,genic_downstream_transcript_variant
rs769093224	DAB1	1:57072273	likely-benign	1:57537946	G>A	genic_downstream_transcript_variant,intron_variant
rs1570632701	DAB1	1:57069408	likely-benign	1:57535081	A>G	coding_sequence_variant,genic_downstream_transcript_variant,synonymous_variant
rs532864586	DAB1	1:57023633	likely-benign,benign	1:57489306	C>T	genic_downstream_transcript_variant,downstream_transcript_variant,coding_sequence_variant,missense_variant,intron_variant
rs12404008	DAB1	1:57015403	likely-benign	1:57481076	C>A,T	2KB_upstream_variant,synonymous_variant,coding_sequence_variant,genic_downstream_transcript_variant,upstream_transcript_
rs183171115	DAB1	1:57014875	likely-benign	1:57480548	G>A,C,T	2KB_upstream_variant,intron_variant,genic_downstream_transcript_variant,500B_downstream_variant,upstream_transcript_variant
rs141647150	DAB1	1:57010704	benign-likely-benign	1:57476377	G>A	non_coding_transcript_variant,genic_downstream_transcript_variant,intron_variant,synonymous_variant,coding_sequence_variant
rs1057519054	DCC	18:53386061	pathogenic	18:50912431	T>G	missense_variant,coding_sequence_variant
rs797044551	DCC	18:52752339	not-provided	18:50278709	C>A,T	genic_upstream_transcript_variant,coding_sequence_variant,stop_gained,missense_variant
rs116498325	DCC	18:53179000	benign	18:50705370	A>T	missense_variant,coding_sequence_variant
rs200099519	DCC	18:53305666	not-provided,benign-likely-benign	18:50832036	G>A,T	missense_variant,coding_sequence_variant
rs141716650	DCC	18:53063381	benign,likely-benign	18:50589751	C>A,T	synonymous_variant,coding_sequence_variant
rs1057518248	DCC	18:53450512	uncertain-significance	18:50976882	G>A	missense_variant,coding_sequence_variant
rs141813053	DCC	18:53157503	likely-benign,uncertain-significance	18:50683873	G>A,T	missense_variant,coding_sequence_variant
rs1085307773	DCC	18:53207745	likely-pathogenic	18:50734115	C>A,G,T	missense_variant,coding_sequence_variant,stop_gained,synonymous_variant
rs775565634	DCC	18:53339808	pathogenic,uncertain-significance	18:50866178	G>A,C	coding_sequence_variant,missense_variant
rs387906555	DCC	18:53526629	pathogenic	18:51052999	C>A,G,T	missense_variant,genic_downstream_transcript_variant,coding_sequence_variant,genic_upstream_transcript_variant,intron_variant
rs1364380970	FADS2	11:61816744	likely-benign	11:61584216	C>A,G,T	genic_upstream_transcript_variant,intron_variant,upstream_transcript_variant,synonymous_variant,2KB_upstream_variant,coding_sequence_v
rs2066989156	FADS2	11:61816789	likely-benign	11:61584261	A>C,T	synonymous_variant,2KB_upstream_variant,intron_variant,upstream_transcript_variant,genic_upstream_transcript_variant,coding_sequence_v
rs118041921	FADS2	11:61848288	benign	11:61615760	C>T	upstream_transcript_variant,intron_variant,2KB_upstream_variant
rs149777687	FADS2	11:61848203	benign	11:61615675	C>T	upstream_transcript_variant,2KB_upstream_variant,synonymous_variant,coding_sequence_variant
rs1453175607	FADS2	11:61814205	not-provided	11:61581677	C>T	intron_variant,upstream_transcript_variant,2KB_upstream_variant
rs1591161560	FADS2	11:61824421	not-provided	11:61591893	A>G	intron_variant,500B_downstream_variant,downstream_transcript_variant,genic_upstream_transcript_variant
rs1447645723	FADS2	11:61834271	not-provided	11:61601743	G>A	intron_variant
rs2135964926	FADS2	11:61845024	not-provided	11:61612496	A>C	intron_variant
rs2067344862	FADS2	11:61855118	not-provided	11:61622590	A>G	intron_variant
rs972367375	FADS2	11:61864957	not-provided	11:61632429	C>A,T	intron_variant
rs1168297160	FADS2	11:61867556	not-provided	11:61635028	A>G	downstream_transcript_variant,500B_downstream_variant
rs190432484	GNB5	15:52147482	benign	15:52439679	T>A,C	synonymous_variant,coding_sequence_variant
rs6493537	GNB5	15:52154003	benign	15:52446200	G>A,C	synonymous_variant,missense_variant,coding_sequence_variant
rs113335851	GNB5	15:52124542	benign-likely-benign	15:52416739	G>A	synonymous_variant,coding_sequence_variant
rs766151886	GNB5	15:52153958	likely-benign	15:52446155	C>A,T	coding_sequence_variant,synonymous_variant,missense_variant
rs770868918	GNB5	15:52124466	likely-benign	15:52416663	C>T	intron_variant
rs756678877	GNB5	15:52184587	likely-benign	15:52476784	A>G	synonymous_variant,genic_upstream_transcript_variant,intron_variant,coding_sequence_variant
rs1330914161	GNB5	15:52141131	likely-benign	15:52433328	C>A	intron_variant
rs147993382	GNB5	15:52147509	likely-benign	15:52439706	C>T	coding_sequence_variant,synonymous_variant
rs1253307264	GNB5	15:52149910	uncertain-significance	15:52442107	C>T	missense_variant,coding_sequence_variant
rs1452240112	GNB5	15:52126037	uncertain-significance	15:52418234	A>C,G	missense_variant,coding_sequence_variant
rs2033629123	GNB5	15:52133451	uncertain-significance	15:52425648	T>C	missense_variant,coding_sequence_variant
rs372011977	GNB5	15:52124517	uncertain-significance	15:52416714	C>T	missense_variant,coding_sequence_variant
rs761399728	GNB5	15:52153947	likely-pathogenic,not-provided,pathogenic	15:52446144	G>A,C,T	missense_variant,stop_gained,coding_sequence_variant
rs80091080	GRID2	4:93238448	benign	4:94159599	T>C,G	coding_sequence_variant,synonymous_variant
rs115664626	GRID2	4:93085050	benign	4:94006201	G>A	genic_upstream_transcript_variant,intron_variant,coding_sequence_variant,synonymous_variant
rs78407646	GRID2	4:93422905	benign	4:94344056	C>T	coding_sequence_variant,synonymous_variant
rs181918786	GRID2	4:93515324	benign	4:94436475	C>G,T	genic_downstream_transcript_variant,synonymous_variant,coding_sequence_variant,missense_variant
rs75225211	GRID2	4:93216803	benign-likely-benign,likely-benign	4:94137954	G>A,T	genic_upstream_transcript_variant,coding_sequence_variant,synonymous_variant,5_prime_UTR_variant
rs142012040	GRID2	4:93490658	benign-likely-benign	4:94411809	G>A,T	genic_downstream_transcript_variant,synonymous_variant,coding_sequence_variant
rs182933054	GRID2	4:93490761	likely-benign	4:94411912	A>G,T	genic_downstream_transcript_variant,coding_sequence_variant,missense_variant
rs759075553	GRID2	4:93769330	likely-benign	4:94690481	C>T	synonymous_variant,coding_sequence_variant,genic_downstream_transcript_variant
rs150053332	GRID2	4:93224628	likely-benign	4:94145779	C>T	synonymous_variant,coding_sequence_variant,5_prime_UTR_variant
rs1728640535	GRID2	4:92590163	uncertain-significance	4:93511314	G>T	coding_sequence_variant,genic_upstream_transcript_variant,missense_variant
rs750331613	GRID2	4:93515346	pathogenic	4:94436497	C>T	coding_sequence_variant,missense_variant,genic_downstream_transcript_variant
rs956279328	HAR1A	20:63099292	not-provided	20:61730644	G>A,C	upstream_transcript_variant,intron_variant,2KB_upstream_variant
rs2066138086	HAR1A	20:63099715	not-provided	20:61731067	G>A	intron_variant,upstream_transcript_variant,2KB_upstream_variant
rs1601177451	HAR1A	20:63099694	not-provided	20:61731046	C>T	intron_variant,upstream_transcript_variant,2KB_upstream_variant
rs2122871899	HAR1A	20:63099654	not-provided	20:61731006	C>T	intron_variant,2KB_upstream_variant,upstream_transcript_variant
rs1029593231	HAR1A	20:63099623	not-provided	20:61730975	C>T	2KB_upstream_variant,upstream_transcript_variant,intron_variant
rs2066137438	HAR1A	20:63099582	not-provided	20:61730934	A>C	intron_variant,upstream_transcript_variant,2KB_upstream_variant
rs574068890	HAR1A	20:63099531	not-provided	20:61730883	C>G	intron_variant,upstream_transcript_variant,2KB_upstream_variant
rs2066137022	HAR1A	20:63099502	not-provided	20:61730854	A>G	intron_variant,upstream_transcript_variant,2KB_upstream_variant
rs762381080	HAR1A	20:63099467	not-provided	20:61730819	C>T	upstream_transcript_variant,intron_variant,2KB_upstream_variant
rs933579923	HAR1A	20:63099433	not-provided	20:61730785	A>C,G	2KB_upstream_variant,intron_variant,upstream_transcript_variant
rs2122871565	HAR1A	20:63099346	not-provided	20:61730698	T>A	intron_variant,2KB_upstream_variant,upstream_transcript_variant
rs76130099	IGF2R	6:160080143	benign	6:160501175	G>A,C	missense_variant,coding_sequence_variant
rs76235629	IGF2R	6:160027232	benign	6:160448264	A>G	missense_variant,coding_sequence_variant
rs8191881	IGF2R	6:160071915	benign	6:160492947	C>A,G,T	coding_sequence_variant,synonymous_variant
rs8191808	IGF2R	6:160048478	benign	6:160469510	C>G	coding_sequence_variant,missense_variant
rs55987511	IGF2R	6:160089173	benign-likely-benign	6:160510205	T>C	coding_sequence_variant,synonymous_variant
rs150809922	IGF2R	6:160027283	benign	6:160448315	C>G,T	coding_sequence_variant,missense_variant
rs199651009	IGF2R	6:160096545	likely-benign	6:160517577	C>G,T	synonymous_variant,coding_sequence_variant,missense_variant,500B_downstream_variant,downstream_transcrip
rs193920850	IGF2R	6:160062621	uncertain-significance	6:160483653	T>C,G	splice_donor_variant
rs756631085	IGF2R	6:160010723	likely-pathogenic	6:160431755	C>T	missense_variant,coding_sequence_variant
rs121434588	IGF2R	6:160070006	pathogenic	6:160491038	G>A	500B_downstream_variant,downstream_transcript_variant,coding_sequence_variant,missense_variant
rs121434587	IGF2R	6:160069961	pathogenic	6:160490993	G>A,T	500B_downstream_variant,downstream_transcript_variant,coding_sequence_variant,missense_variant
rs1342235871	KMT2D	12:49033015	benign,likely-benign,uncertain-significance	12:49426798	A>G	missense_variant,coding_sequence_variant
rs111266743	KMT2D	12:49044235	not-provided	12:49438018	G>A,C,T	missense_variant,coding_sequence_variant
rs1592145879	KMT2D	12:49046278	not-provided	12:49440061	T>C	coding_sequence_variant,missense_variant
rs1057520167	KMT2D	12:49055323	likely-pathogenic	12:49449106	A>C,G,T	missense_variant,initiator_codon_variant
rs1555198921	KMT2D	12:49055027	likely-pathogenic	12:49448810	C>A	splice_acceptor_variant
rs1243381790	KMT2D	12:49054967	likely-benign,benign	12:49448750	G>A,T	missense_variant,coding_sequence_variant
rs398123747	KMT2D	12:49054340	likely-benign,uncertain-significance	12:49448123	A>C,T	synonymous_variant,coding_sequence_variant
rs141231056	KMT2D	12:49052318	likely-benign,benign	12:49446101	T>C,G	synonymous_variant,coding_sequence_variant,missense_variant
rs746084513	KMT2D	12:49049699	uncertain-significance,benign	12:49443482	G>A,C,T	missense_variant,coding_sequence_variant
rs794727420	KMT2D	12:49042846	pathogenic	12:49436629	G>A	coding_sequence_variant,stop_gained
rs75783546	KMT2D	12:49042338	benign	12:49436121	G>A	intron_variant
rs398123755	KMT2D	12:49040792	uncertain-significance	12:49434575	G>A,C	synonymous_variant,coding_sequence_variant
rs1943280408	KMT2D	12:49037527	pathogenic	12:49431310	G>A,C	missense_variant,stop_gained,coding_sequence_variant
rs371223664	KMT2D	12:49034472	likely-benign,uncertain-significance,benign	12:49428255	C>T	missense_variant,coding_sequence_variant
rs112170602	KMT2D	12:49033712	uncertain-significance,benign,benign-likely-benign,likely-benign	12:49427495	G>A,C	missense_variant,coding_sequence_variant
rs1592118953	KMT2D	12:49032734	pathogenic	12:49426517	G>A	coding_sequence_variant,stop_gained
rs201119371	KMT2D	12:49030920	benign-likely-benign,benign	12:49424703	G>A,C	missense_variant,synonymous_variant,coding_sequence_variant
rs1555187117	KMT2D	12:49030622	pathogenic	12:49424405	G>A,C,T	coding_sequence_variant,synonymous_variant,stop_gained
rs1942683224	KMT2D	12:49027871	pathogenic	12:49421654	G>A,C	coding_sequence_variant,missense_variant,stop_gained
rs1555184538	KMT2D	12:49021805	uncertain-significance	12:49415588	C>T	coding_sequence_variant,stop_gained
rs2920676	MCPH1	8:6445150	benign	8:6302671	C>T	synonymous_variant,non_coding_transcript_variant,coding_sequence_variant
rs2305023	MCPH1	8:6406609	benign	8:6264130	G>C	2KB_upstream_variant,upstream_transcript_variant
rs1550697	MCPH1	8:6409253	benign,likely-benign	8:6266774	G>A	intron_variant
rs587783733	MCPH1	8:6414778	uncertain-significance,likely-pathogenic	8:6272299	T>C	missense_variant,non_coding_transcript_variant,coding_sequence_variant
rs775942126	MCPH1	8:6414866	likely-benign,conflicting-interpretations-of-pathogenicity	8:6272387	G>A,C,T	synonymous_variant,coding_sequence_variant,non_coding_transcript_variant
rs201721894	MCPH1	8:6436047	likely-pathogenic,uncertain-significance	8:6293568	G>C,T	intron_variant,splice_acceptor_variant
rs2053618	MCPH1	8:6442011	benign	8:6299532	A>C,G,T	intron_variant
rs145820898	MCPH1	8:6444774	uncertain-significance	8:6302295	G>T	coding_sequence_variant,missense_variant,non_coding_transcript_variant
rs548329168	MCPH1	8:6445125	ikely-benign,uncertain-significance,conflicting-interpretations-of-pathogenicity	8:6302646	C>A,G	coding_sequence_variant,missense_variant,non_coding_transcript_variant
rs115033462	MCPH1	8:6445503	uncertain-significance,benign,benign-likely-benign	8:6303024	C>G,T	coding_sequence_variant,missense_variant,non_coding_transcript_variant
rs370275760	MCPH1	8:6480848	uncertain-significance	8:6338369	G>A,C,T	genic_downstream_transcript_variant,coding_sequence_variant,intron_variant,missense_variant
rs2936531	MCPH1	8:6621435	benign,likely-benign	8:6478956	A>C,G	genic_downstream_transcript_variant,non_coding_transcript_variant,intron_variant
rs2011423	MCPH1	8:6621976	benign	8:6479497	G>A,C	genic_downstream_transcript_variant,downstream_transcript_variant,intron_variant,500
rs320820	NBPF8	1:120449281	not-provided	1:144621535	A>G	coding_sequence_variant,synonymous_variant,non_coding_transcript_variant
rs1210092201	NBPF8	1:120434059	not-provided	1:144612669	T>C,G	intron_variant,non_coding_transcript_variant
rs1293062874	NBPF8	1:120430560	not-provided	1:144609223	A>G	intron_variant
rs1378831317	NBPF8	1:120468376	not-provided		G>T	genic_downstream_transcript_variant,non_coding_transcript_variant,3_prime_UTR_variant
rs1469790408	NBPF8	1:120423274	not-provided	1:144601937	T>C	intron_variant
rs1660411467	NBPF8	1:120415584	not-provided	1:144594245	G>T	intron_variant,upstream_transcript_variant,genic_upstream_transcript_variant
rs1660852853	NBPF8	1:120430716	not-provided	1:144609379	G>A	intron_variant
rs1661374355	NBPF8	1:120454344	not-provided		G>C	intron_variant
rs1661790471	NBPF8	1:120467975	not-provided		T>C	downstream_transcript_variant,3_prime_UTR_variant,non_coding_transcript_variant,genic_downstream_transcript
rs2101536757	NBPF8	1:120428517	not-provided	1:144607180	A>G	intron_variant
rs518881	NBPF8	1:120429143	not-provided	1:144607806	C>A,G,T	intron_variant
rs1638305116	NBPF8	1:120449089	not-provided	1:144621343	C>A,T	intron_variant
rs8002	NOTCH2NLA	1:146156641	not-provided	1:145281543	G>A,T	coding_sequence_variant,missense_variant
rs868975060	NOTCH2NLA	1:146170994	not-provided	1:145267201	T>C	intron_variant
rs1299634089	NOTCH2NLA	1:146166322	not-provided	1:145271873	G>T	intron_variant
rs1450495295	NOTCH2NLA	1:146159068	not-provided	1:145279116	G>C,T	intron_variant
rs1553806412	NOTCH2NLA	1:146168763	not-provided	1:145269432	G>A	intron_variant
rs1553814256	NOTCH2NLA	1:146202580	not-provided	1:145235607	G>A,T	intron_variant
rs1571267596	NOTCH2NLA	1:146159997	not-provided	1:145278198	G>T	intron_variant
rs1661787802	NOTCH2NLA	1:146166872	not-provided	1:145271323	G>A	intron_variant
rs1663242974	NOTCH2NLA	1:146197914	not-provided	1:145240278	G>A,C	intron_variant
rs2102289207	NOTCH2NLA	1:146167834	not-provided	1:145270361	A>G	intron_variant
rs1553818207	NOTCH2NLA	1:146221347	not-provided	1:145216819	G>A	intron_variant
rs363050	SNAP25	20:10253609	benign	20:10234257	G>A	intron_variant
rs769950821	SNAP25	20:10275495	uncertain-significance	20:10256143	G>A,C,T	coding_sequence_variant,missense_variant
rs201770060	SNAP25	20:10275504	benign	20:10256152	G>A	coding_sequence_variant,missense_variant
rs371883444	SNAP25	20:10277676	likely-benign	20:10258324	A>G	intron_variant
rs763997141	SNAP25	20:10277726	uncertain-significance	20:10258374	G>A,C	missense_variant,coding_sequence_variant,synonymous_variant
rs797044873	SNAP25	20:10284751	likely-pathogenic,not-provided	20:10265399	G>T	coding_sequence_variant,missense_variant
rs1568623929	SNAP25	20:10293007	uncertain-significance	20:10273655	C>A	intron_variant
rs1555794286	SNAP25	20:10293197	pathogenic,likely-pathogenic	20:10273845	T>A	intron_variant,coding_sequence_variant,missense_variant
rs362998	SNAP25	20:10296973	benign	20:10277621	C>T	synonymous_variant,coding_sequence_variant
rs533404025	SNAP25	20:10306198	uncertain-significance	20:10286846	G>C	genic_downstream_transcript_variant,3_prime_UTR_variant
rs79020892	SNAP25	20:10306125	benign	20:10286773	C>T	intron_variant,genic_downstream_transcript_variant
rs200030321	SNAP25	20:10299394	likely-benign	20:10280042	C>G,T	genic_downstream_transcript_variant,missense_variant,synonymous_variant,coding_sequence_variant
rs1871070779	SNAP25	20:10297053	uncertain-significance	20:10277701	G>A	intron_variant,terminator_codon_variant,synonymous_variant
rs1601642812	EP300	22:41178955	pathogenic	22:41574959	A>G,T	terminator_codon_variant,stop_lost
rs2059220495	EP300	22:41178808	likely-pathogenic	22:41574812	G>0	coding_sequence_variant,frameshift_variant
rs142673005	EP300	22:41178347	benign-likely-benign,benign	22:41574351	G>A,T	coding_sequence_variant,synonymous_variant,missense_variant
rs144626200	EP300	22:41177668	likely-benign,uncertain-significance	22:41573672	C>A,G,T	coding_sequence_variant,missense_variant
rs1057518002	EP300	22:41177194	likely-pathogenic	22:41573198	T>C	missense_variant,coding_sequence_variant
rs1555912107	EP300	22:41176785	likely-pathogenic	22:41572789	T>C,G	missense_variant,coding_sequence_variant
rs755816596	EP300	22:41176309	likely-benign	22:41572313	T>A,C	synonymous_variant,missense_variant,coding_sequence_variant
rs1601636833	EP300	22:41173612	likely-benign	22:41569616	C>A,T	intron_variant
rs6002271	EP300	22:41170591	benign	22:41566595	C>A,G,T	intron_variant
rs1464734494	EP300	22:41169503	likely-pathogenic	22:41565507	G>A,C	missense_variant,synonymous_variant,coding_sequence_variant
rs1114167305	EP300	22:41162784	pathogenic	22:41558788	G>C	intron_variant
rs199773872	EP300	22:41154986	benign	22:41550990	T>C	intron_variant
rs2059047548	EP300	22:41151870	pathogenic	22:41547874	C>G	coding_sequence_variant,stop_gained
rs774840930	EP300	22:41149894	likely-benign	22:41545898	G>A,C,T	missense_variant,coding_sequence_variant
rs750740148	EP300	22:41140160	likely-benign,uncertain-significance	22:41536164	C>T	coding_sequence_variant,missense_variant
rs886057556	EP300	22:41131621	uncertain-significance	22:41527625	A>C,G	coding_sequence_variant,missense_variant
